# Supplementary material
Source: publisher figshare collection journal article supplement (https://acs.figshare.com/ndownloader/files/4388863)

**Supporting Information for**

**Monodisperse Cobalt Ferrite Nanomagnets with Uniform Silica**

**Coatings**

*Qiu Dai, Michelle Lam, Sally Swanson, Rui-Hui Rachel Yu,  
Delia J. Milliron, Pierre-Olivier Jubert,\* and Alshakim Nelson\**

IBM Almaden Research Center,  
650 Harry Road, San Jose, CA 95120 (USA)  
E-mail: alshak@us.ibm.com, pjubert@us.ibm.com

**Figure S1.** Hysteresis loops measured by VSM (298 K) of the oleic acid-stabilized  $\text{CoFe}_2\text{O}_4$  SPMNPs and  $\text{CoFe}_2\text{O}_4$  (FMNPs).

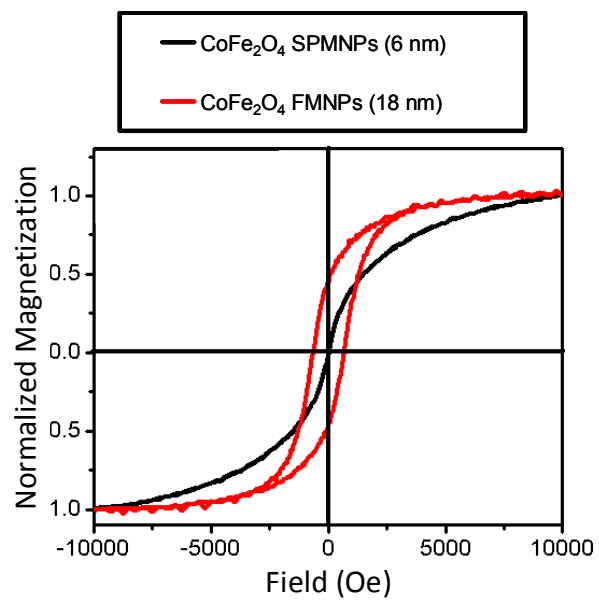

**Figure S2.** TEM image of superparamagnetic  $\text{CoFe}_2\text{O}_4$  nanoparticles (6 nm) encapsulated by a silica shell produced using a reverse microemulsion process.<sup>8d</sup>

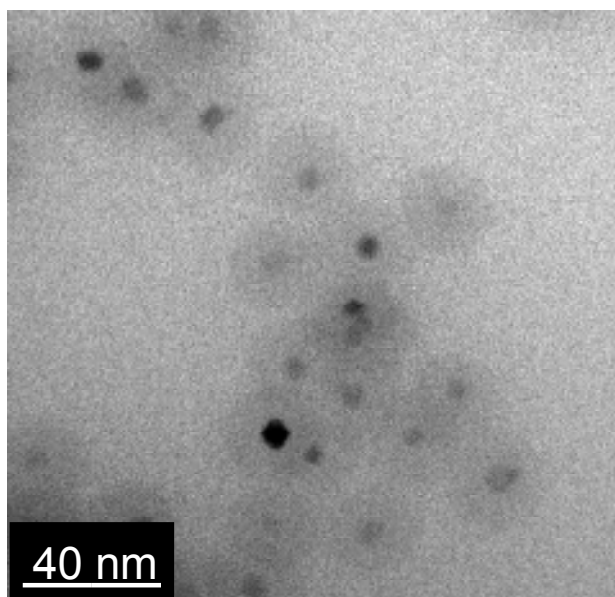

**Figure S3.** (a) Freshly prepared 20 nm silica-coated cobalt ferrite nanoparticles dispersed in ethanol; (b) the particles were attracted to the vial wall using magnet; (c) after removing magnetic field, the particles return back to the solution and were stable for more than 3 months.

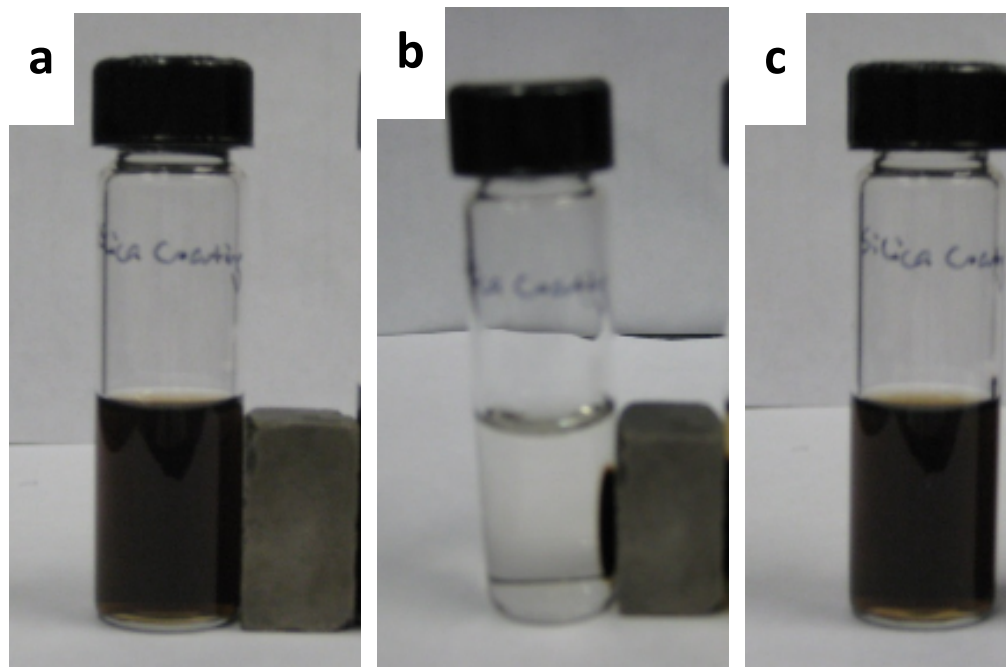

**Figure S4.** TEM image of 18 nm PAA-modified  $\text{CoFe}_2\text{O}_4$  FMNPs

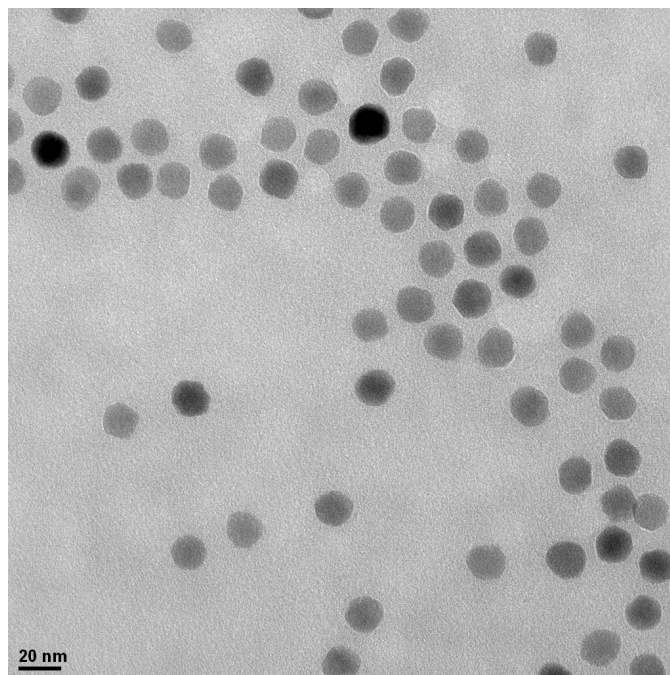

Supplement: Supplementary file 1 [file 4388863]
